# Supplementary material for: Developmental deprivation-induced perceptual and cortical processing deficits in awake-behaving animals
Source: eLife journal article supplement (doi:10.7554/elife.33891), 2018-06-06
Supplement: supp [file elife-33891-supp-v2.zip]

Archive with 2 entries (2 files):
- elife_poa_e33891_Transparent_Reporting_File.pdf
- elife_poa_e33891_Figure_6_figure_supplement_1.eps
